# Supplementary material for: Effect of an additive TAB-1 on crystallization behaviors and tensile properties of iPB-1
Source: Royal Society of Chemistry journal article supplement (doi:10.1039/d1ce01612a), 2022-01-01
Supplement: d1ce01612a1.pdf [file d1ce01612a1.pdf]

## Effect of an additive TAB-1 on crystallization behaviors and tensile properties of iPB-1

Jingqing Li\*, Ruo Bai, Shichun Jiang\*

School of Materials Science and Engineering, Tianjin University, Tianjin 300072, China

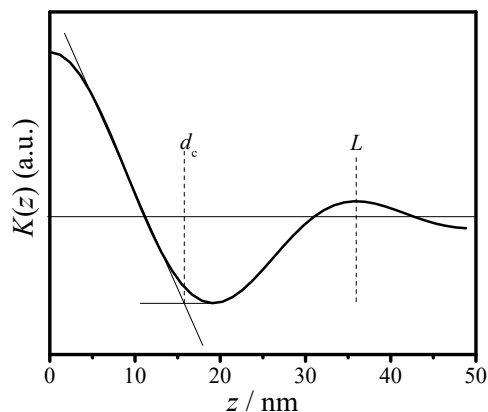

Figure S1 Schematics of crystalline lamella thickness  $d_c$  determination from the one dimension electron density correlation function as shown in Equation (1).

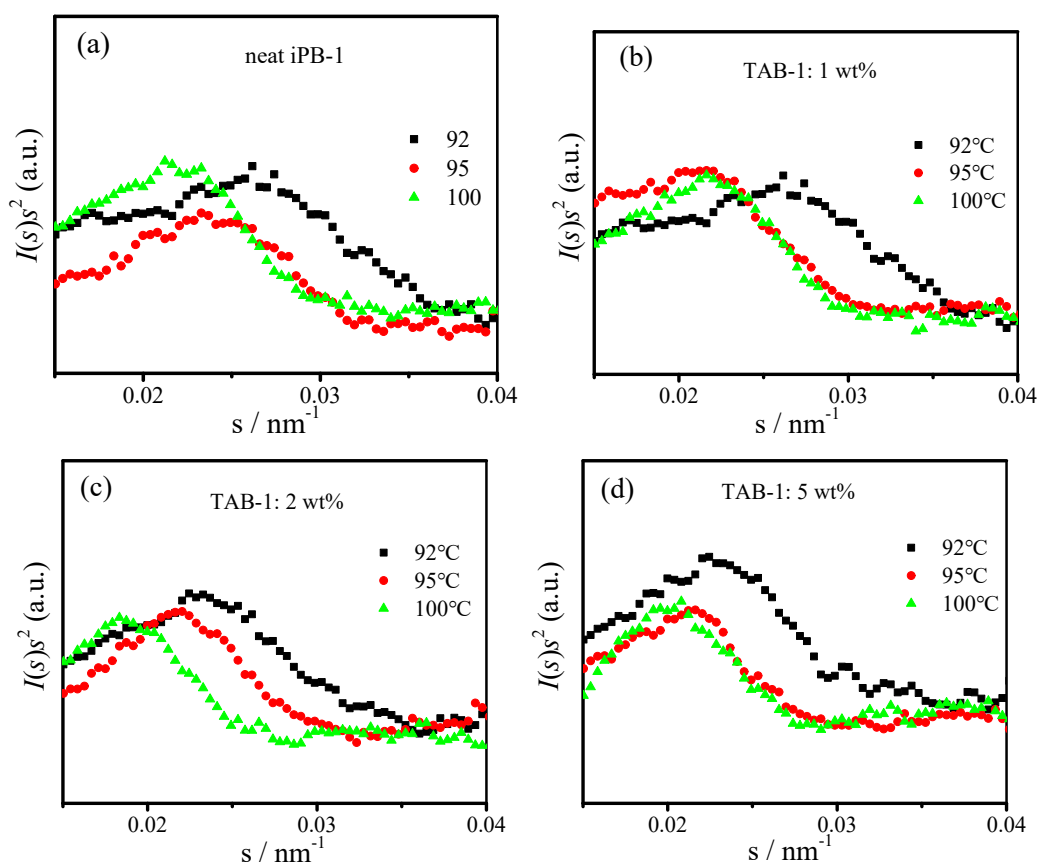

Figure S2 The Lorentz-corrected SAXS data of the isothermally crystallized iPB-1/TAB-1 with various TAB-1 weight proportions in comparison with neat iPB-1

\* Corresponding authors: [jqli11103@tju.edu.cn](mailto:jqli11103@tju.edu.cn), [scjiang@tju.edu.cn](mailto:scjiang@tju.edu.cn)

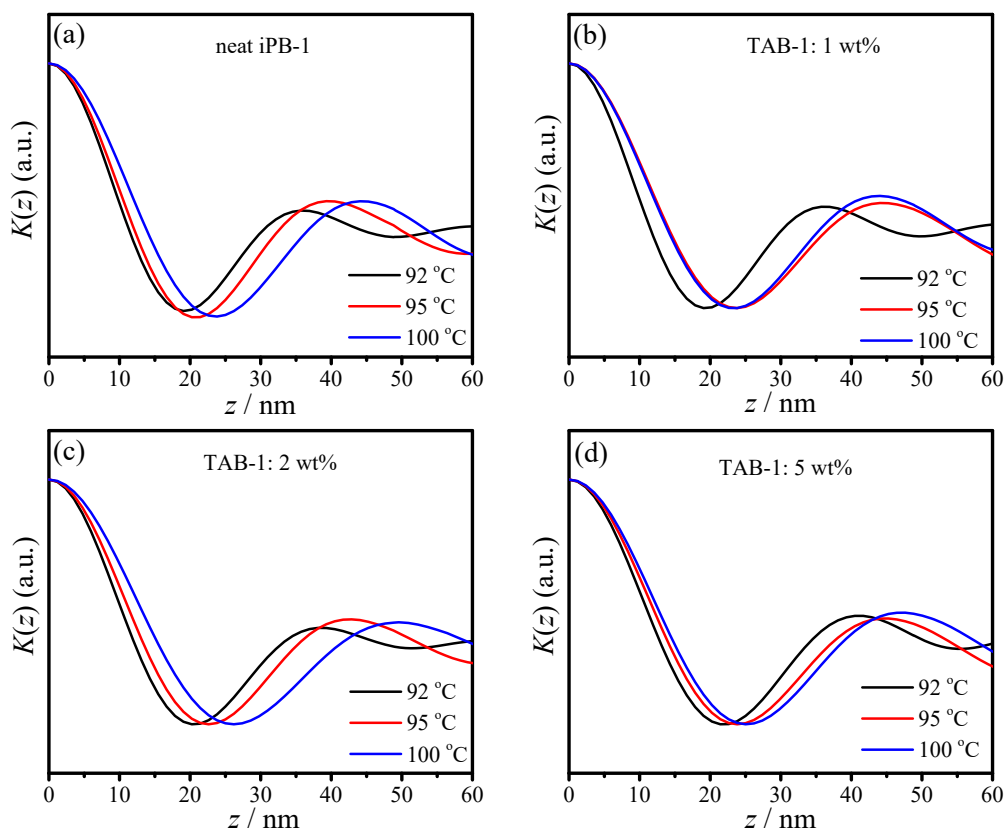

Figure S3 One dimension electron density correlation function plots of the isothermally crystallized iPB-1/TAB-1 with various TAB-1 weight proportions in comparison with neat iPB-1

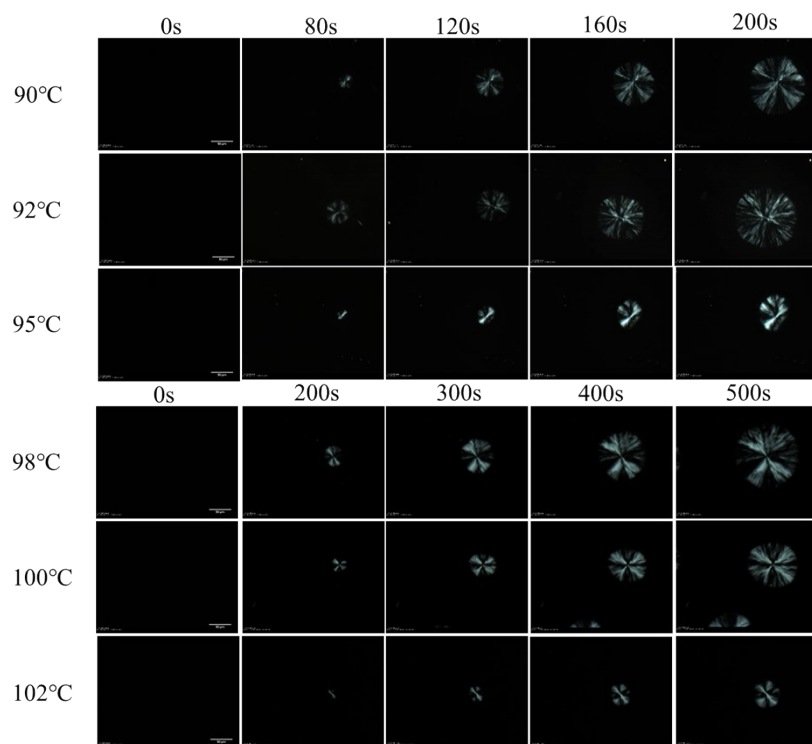

Figure S4 POM images of neat iPB-1 obtained at various isothermal crystallization temperatures  $T_c$  for different time after melting at 180 °C for 3 min and soon cooling to the  $T_c$ s

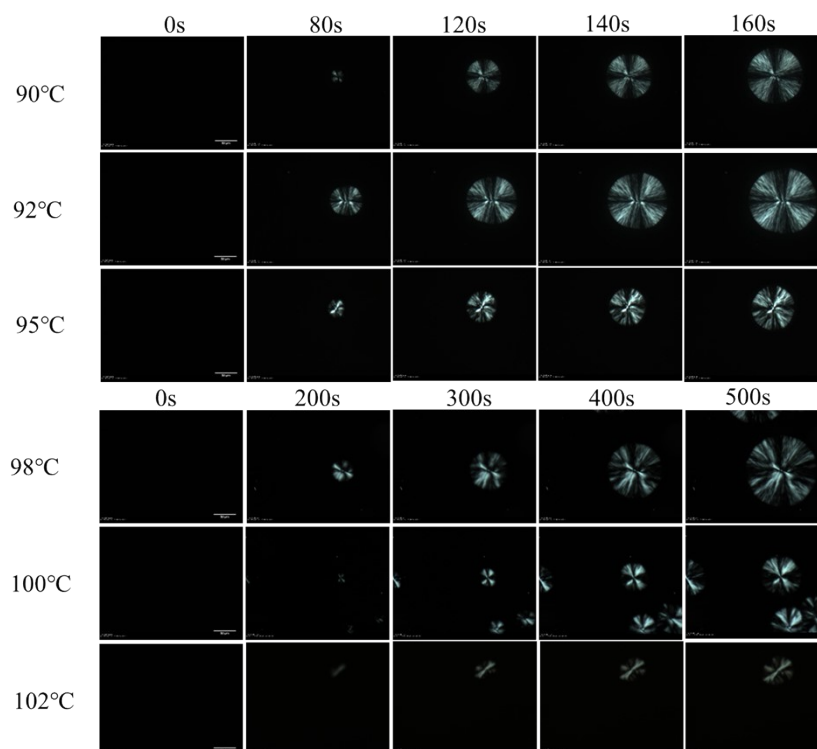

**Figure S5** POM images of the iPB-1/TAB-1 with TAB-1 weight proportion of 1 wt% obtained at various isothermal crystallization temperatures  $T_c$ s for different time after melting at 180 °C for 3 min and soon cooling to the  $T_c$ s

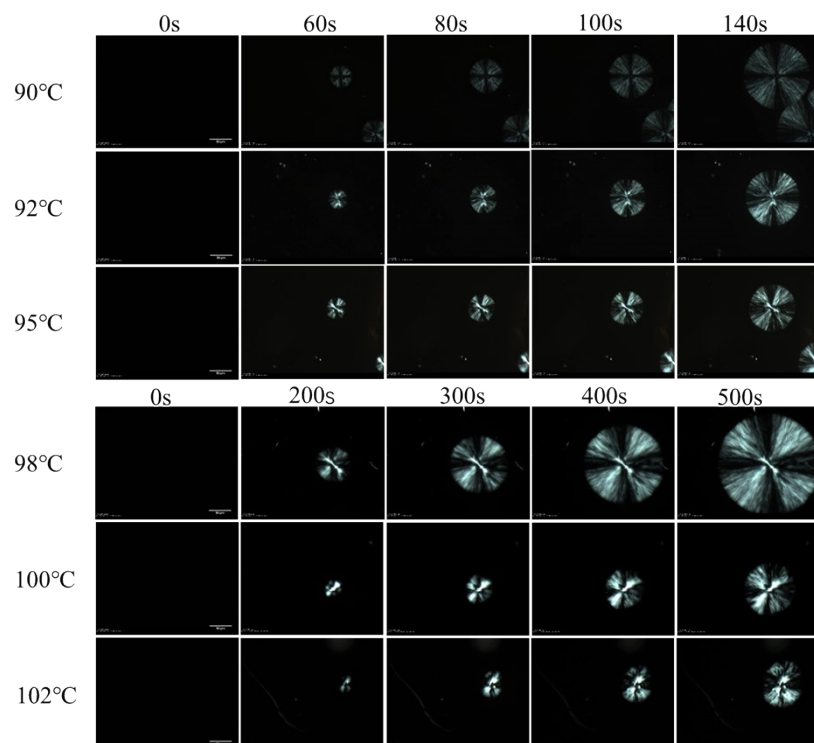

**Figure S6** POM images of the iPB-1/TAB-1 with TAB-1 weight proportion of 5 wt% obtained at various isothermal crystallization temperatures  $T_c$ s for different time after melting at 180 °C for 3 min and soon cooling to the  $T_c$ s

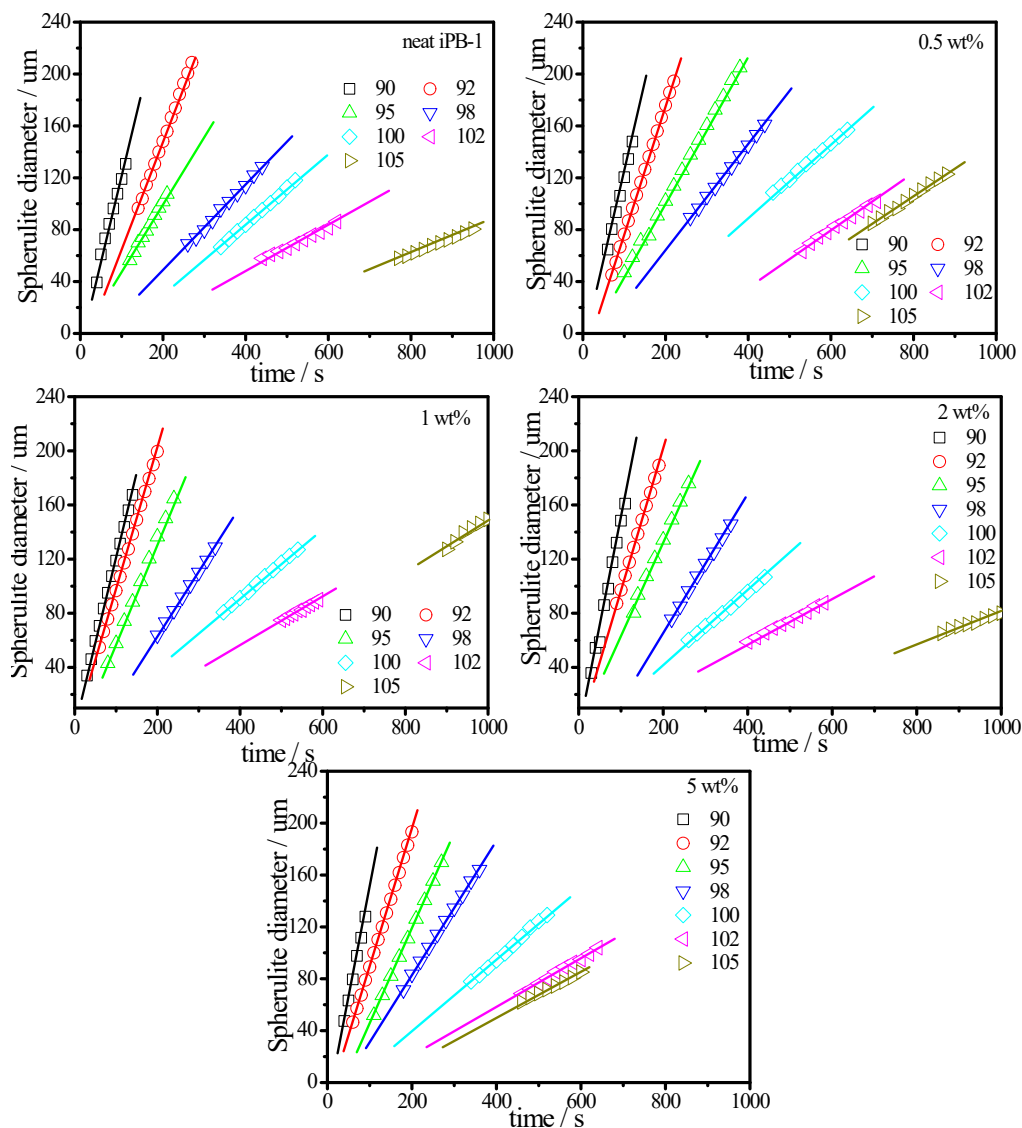

**Figure S7** POM images of the iPB-1/TAB-1 with TAB-1 weight proportion of 5 wt% obtained at various isothermal crystallization temperatures  $T_c$ s for different time after melting at 180 °C for 3 min and soon cooling to the  $T_c$ s

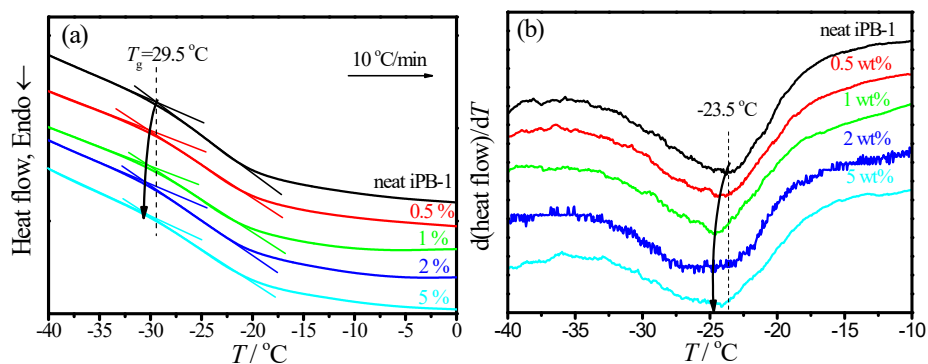

**Figure S8** Variation of glass transition temperature  $T_g$  of iPB-1 in iPB-1/TAB-1 with various TAB-1 weight proportions determined by DSC from the curves shown in (a) and (b) at a heating rate of 10 °C/min after melting at 200 °C for 5 min and then cooling at 30 °C/min to -60 °C for 5 min.

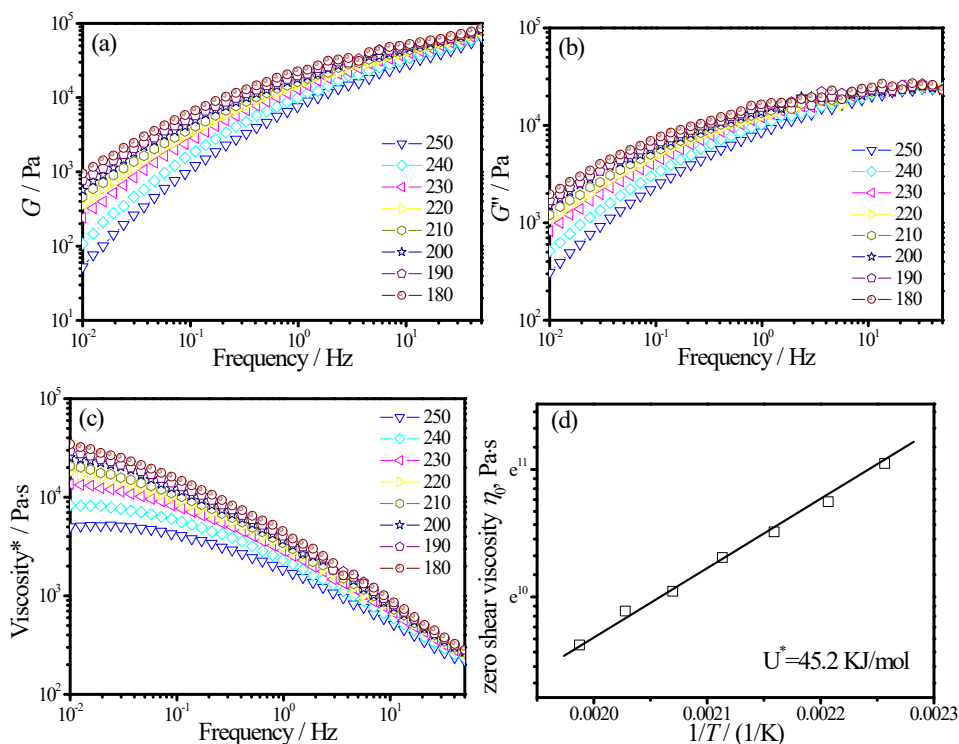

**Figure S9** Frequency-dependent storage modulus  $G'$ , loss modulus  $G''$ , viscosity\* within linear viscoelastic regime and determination of  $U^*$  by linear fitting of the resulting  $\eta_0 \sim 1/T$  curve via time-Temperature-Supposition (tTS) to estimate the  $\eta_0$  values at various temperatures  $T_s$ .

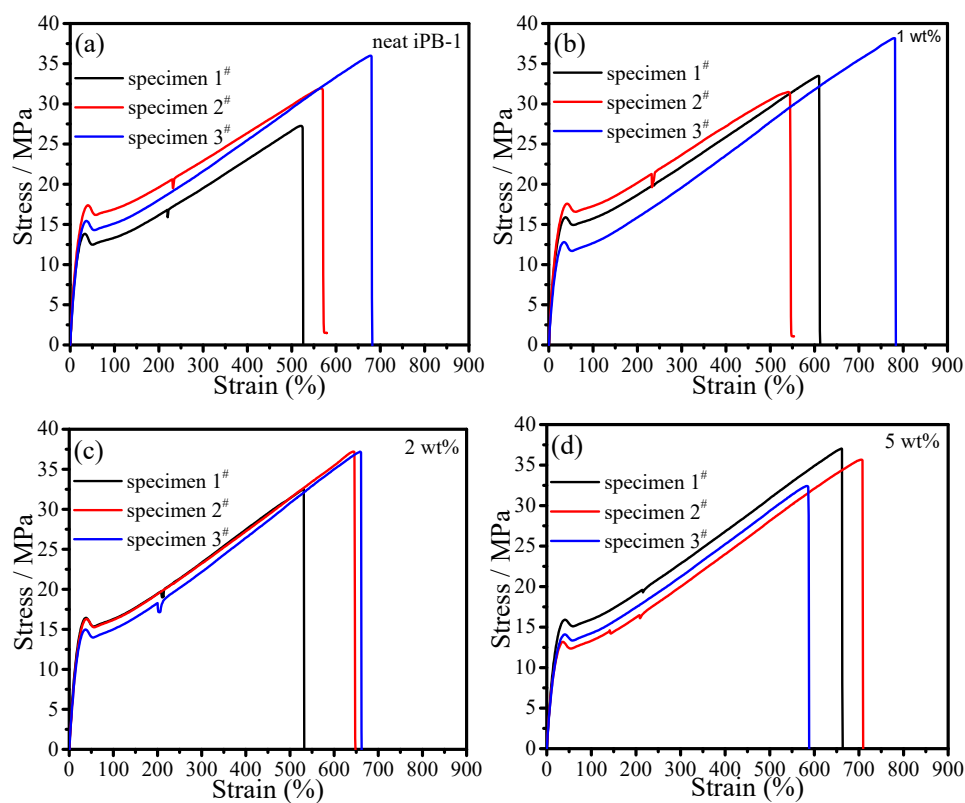

**Figure S10** Engineering stress-strain curves of the iPB-1/TAB-1 with various TAB-1 weight proportions obtained at 30 °C at a speed of 5 mm/min

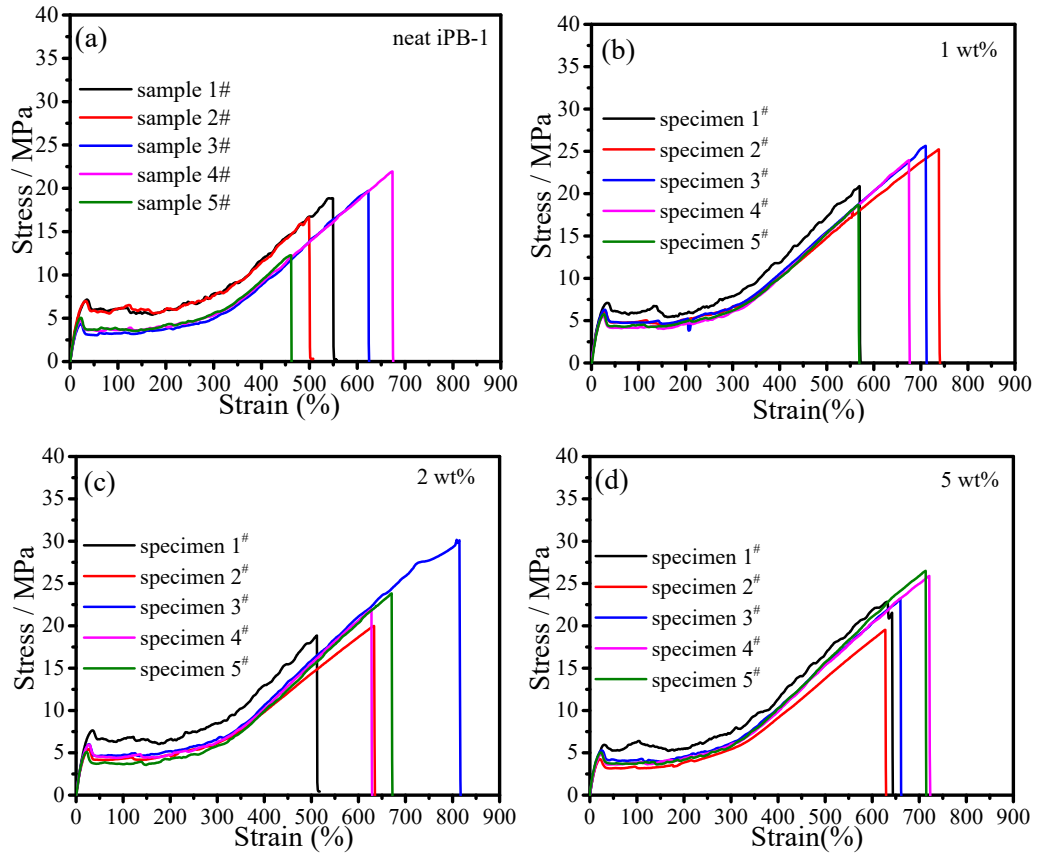

**Figure S11** Engineering stress-strain curves of the iPB-1/TAB-1 with various TAB-1 weight proportions obtained at 95 °C at a speed of 5 mm/min
